# Supplementary material
Source: PubMed Central journal article supplement (PMC1369184)
Supplement: 6-7400503-s1.pdf [file 6-7400503-s1.pdf]

## Supplemental Figure 1

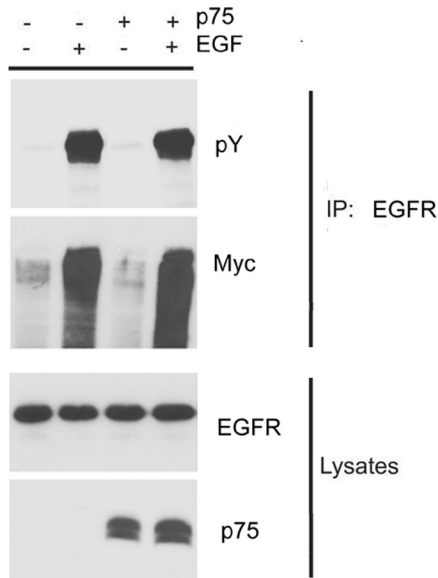

Supplemental Figure 1: p75NTR does not alter EGF receptor ubiquitination. HEK293 cells were transfected with expression plasmids encoding EGF receptor, myc-tagged ubiquitin and, as indicated, with p75NTR. 2 days after the transfection, cells were treated with EGF (50 ng/ml) for 15 minutes (as indicated) and lysed. EGF receptor was immunoprecipitated and analyzed by immunoblot for phosphotyrosine (pY) and for incorporated ubiquitin (Myc). Lysate levels of EGF receptor (EGFR) and p75NTR (p75) are shown in lower panels. This experiment was repeated three times, with essentially identical results.
